# Supplementary material for: Proteomic Signatures of Healthy Intervertebral Discs From Organ Donors: A Comparison With Previous Studies on Discs From Scoliosis, Animals, and Trauma
Source: PubMed Central journal article supplement — Neurospine. 2020 Jun 30;17(2):426–42. doi: 10.14245/ns.2040056.028 (PMC7338947; doi:10.14245/ns.2040056.028), 2020-06-30
Supplement: ns-2040056-028-suppl1.pdf [file ns-2040056-028-suppl1.pdf]

Supplementary Table 1. Proteins reported in literature versus this study

| Gene symbol    | Name                                             | Organisms                     | Method                                      | Presence/absence | Reference                                                                  |
|----------------|--------------------------------------------------|-------------------------------|---------------------------------------------|------------------|----------------------------------------------------------------------------|
| <i>Sox9</i>    | Transcription factor Sox-9-A                     | Bovine, Human, canine         | In-situ hybridization                       | -                | Sive et al., 2002 <sup>11</sup>                                            |
| <i>ACAN</i>    | Aggrecan                                         | Bovine, Human, canine         | Microarray                                  | +                | Pattappa et al., 2012 <sup>12</sup>                                        |
| <i>COL2A1</i>  | Collagen Type II A                               | Bovine, Human, canine         | Microarray                                  | +                | Lee et al., 2007 <sup>13</sup>                                             |
| <i>KRT19</i>   | Keratin 19                                       | Bovine, Human, canine         | Microarray                                  | +                | Minogue et al., 2010 <sup>14</sup>                                         |
| <i>KRT18</i>   | Keratin 18                                       | Bovine, Human, canine         | Microarray                                  | +                | Minogue et al., 2010 <sup>14</sup> , Sakai et al., 2009 <sup>15</sup>      |
| <i>NCAM1</i>   | Neural cell adhesion molecule 1                  | Bovine, canine                | Microarray                                  | -                | Minogue et al., 2010 <sup>14</sup> , Sakai et al., 2009 <sup>15</sup>      |
| <i>KRT8</i>    | Keratin 8                                        | Bovine, Human, canine, Murine | Transcriptomic profiling                    | +                | Minogue et al., 2010 <sup>14</sup>                                         |
| <i>SNAP25</i>  | Synaptosomal-associated protein 25               | Bovine                        | Transcriptomic profiling                    | -                | Minogue et al., 2010 <sup>14</sup>                                         |
| <i>CDH2</i>    | Cadherin-2                                       | Bovine                        | Transcriptomic profiling                    | -                | Minogue et al., 2010 <sup>14</sup>                                         |
| <i>SOSTDC1</i> | Sclerostin domain-containing protein 1           | Bovine                        | Transcriptomic profiling                    | -                | Minogue et al., 2010 <sup>14</sup>                                         |
| <i>GPC3</i>    | Glypican-3                                       | Murine                        | Transcriptomic profiling, proteome analysis | -                | Lee et al., 2007 <sup>13</sup>                                             |
| <i>ANXA3</i>   | Annexin A3                                       | Murine                        | Transcriptomic profiling                    | +                | Lee et al., 2007 <sup>13</sup>                                             |
| <i>PTN</i>     | Pleiotrophin                                     | Murine                        | Transcriptomic profiling                    | -                | Lee et al., 2007 <sup>13</sup>                                             |
| <i>A2M</i>     | alpha-2-macroglobulin                            | Human                         | Microarray                                  | +                | Rodrigues-Pinto et al., 2013 <sup>16</sup>                                 |
| <i>DSC2</i>    | Desmocollin-2, cell surface markers              | Human, Canine                 | Microarray                                  | +                | Sakai et al., 2009 <sup>15</sup>                                           |
| <i>VIM</i>     | Vimentin                                         | Murine                        | Transcriptomic profiling                    | +                | Lee et al., 2007 <sup>13</sup>                                             |
| <i>Pax-1</i>   | Paired box protein Pax-1                         | Human                         | Transcriptomic profiling                    | -                | Richardson et al., 2017 <sup>17</sup>                                      |
| <i>CA12</i>    | carbonic anhydrase-12                            | Human                         | Transcriptomic profiling                    | -                | Richardson et al., 2017 <sup>17</sup> , Minogue et al., 2010 <sup>14</sup> |
| <i>CD24</i>    | cluster differentiation 24 (cell surface marker) | Murine                        | Transcriptome                               | -                | Fujita et al., 2005 <sup>18</sup> , Tang et al., 2012 <sup>19</sup>        |
| <i>TNFAIP6</i> | TNF alpha-induced protein 6                      | Bovine                        | Microarray analysis                         | +                | Minogue et al., 2010 <sup>14</sup>                                         |
| <i>FOXF1</i>   | N-cad, forkhead box F1                           | Bovine, Human                 | Microarray analysis                         | -                | Richardson et al., 2017 <sup>17</sup> , Minogue et al., 2010 <sup>14</sup> |
| <i>FOXF2</i>   | Forkhead box protein F2                          | Bovine                        | Microarray analysis                         | -                | Minogue et al., 2010 <sup>14</sup>                                         |

Candidate IVD-associated proteins/genes previously reported based on the proteome, transcriptional, immunolocalization analysis of human, murine, bovine and canine IVD. +/- indicates the presence/absence in our study.
