# Supplementary material for: Proteomic Signatures of Healthy Intervertebral Discs From Organ Donors: A Comparison With Previous Studies on Discs From Scoliosis, Animals, and Trauma
Source: PubMed Central journal article supplement — Neurospine. 2020 Jun 30;17(2):426–42. doi: 10.14245/ns.2040056.028 (PMC7338947; doi:10.14245/ns.2040056.028), 2020-06-30
Supplement: ns-2040056-028-suppl2.pdf [file ns-2040056-028-suppl2.pdf]

**Supplementary Table 2.** Detailed list of 105 enriched pathways from STRING (Search Tool for the Retrieval of Interacting Genes/Proteins) database

| No. | Enriched pathways                               | Total number of proteins involved | p-value  | Gene symbols                                                                                                                                                                                                                                                                                                                                                                |
|-----|-------------------------------------------------|-----------------------------------|----------|-----------------------------------------------------------------------------------------------------------------------------------------------------------------------------------------------------------------------------------------------------------------------------------------------------------------------------------------------------------------------------|
| 1   | Extracellular matrix organization               | 37                                | 8.90E-24 | A2M, ACAN, ASPN, BGN, CD47, COL10A1, COL11A2, COL14A1, COL15A1, COL1A1, COL1A2, COL2A1, COL6A1, COL6A2, COL6A3, COMP, DCN, FGA, FGB, FGG, FMOD, GDF5, HAPLN1, HSPG2, HTRA1, LOX, LUM, MMP10, PCOLCE, PCOLCE2, PPIB, THBS1, TIMP1, TNC, TTR, VCAN, VTN                                                                                                                       |
| 2   | ECM proteoglycans                               | 18                                | 9.26E-16 | ACAN, ASPN, BGN, COL1A1, COL1A2, COL2A1, COL6A1, COL6A2, COL6A3, COMP, DCN, FMOD, HAPLN1, HSPG2, LUM, TNC, VCAN, VTN                                                                                                                                                                                                                                                        |
| 3   | Integrin cell surface interactions              | 17                                | 6.49E-14 | CD47, COL10A1, COL1A1, COL1A2, COL2A1, COL6A1, COL6A2, COL6A3, COMP, FGA, FGB, FGG, HSPG2, LUM, THBS1, TNC, VTN                                                                                                                                                                                                                                                             |
| 4   | Collagen biosynthesis and modifying enzymes     | 13                                | 1.63E-10 | COL10A1, COL11A2, COL14A1, COL15A1, COL1A1, COL1A2, COL2A1, COL6A1, COL6A2, COL6A3, PCOLCE, PCOLCE2, PPIB                                                                                                                                                                                                                                                                   |
| 5   | Collagen formation                              | 14                                | 2.61E-10 | COL10A1, COL11A2, COL14A1, COL15A1, COL1A1, COL1A2, COL2A1, COL6A1, COL6A2, COL6A3, LOX, PCOLCE, PCOLCE2, PPIB                                                                                                                                                                                                                                                              |
| 6   | Glycosaminoglycan metabolism                    | 12                                | 4.88E-07 | ACAN, B3GNT7, BGN, DCN, FMOD, HSPG2, LUM, OGN, OMD, PRELP, VCAN, XYLT1                                                                                                                                                                                                                                                                                                      |
| 7   | Keratan sulfate degradation                     | 6                                 | 5.80E-07 | ACAN, FMOD, LUM, OGN, OMD, PRELP                                                                                                                                                                                                                                                                                                                                            |
| 8   | Gluconeogenesis                                 | 5                                 | 0.00054  | ENO1, GAPDH, PGAM2, PGK1, TPI1                                                                                                                                                                                                                                                                                                                                              |
| 9   | Formation of the cornified envelope             | 29                                | 1.66E-24 | CDSN, DSG1, DSP, JUP, KRT1, KRT10, KRT14, KRT15, KRT16, KRT17, KRT19, KRT2, KRT33A, KRT4, KRT5, KRT6A, KRT6B, KRT6C, KRT72, KRT73, KRT76, KRT77, KRT78, KRT79, KRT8, KRT80, KRT84, KRT9, TGM5                                                                                                                                                                               |
| 10  | Platelet degranulation                          | 22                                | 1.04E-16 | A1BG, A2M, ALB, ANXA5, APOA1, CD109, CLEC3B, CLU, F13A1, FGA, FGB, FGG, HRG, ITH4, QSOX1, SERPINA1, SERPING1, TF, THBS1, TIMP1, TIMP3, TTN                                                                                                                                                                                                                                  |
| 11  | Platelet activation, signalling and aggregation | 25                                | 6.50E-14 | A1BG, A2M, ALB, ANXA5, APOA1, CD109, CLEC3B, CLU, COL1A1, COL1A2, F13A1, FGA, FGB, FGG, HRG, ITH4, QSOX1, RASGRP2, SERPINA1, SERPING1, TF, THBS1, TIMP1, TIMP3, TTN                                                                                                                                                                                                         |
| 12  | Innate immune system                            | 45                                | 2.71E-13 | A1BG, ACTG1, ANXA2, ARG1, C1S, C3, C9, CALML5, CASP8, CD47, CFB, CFI, CHI3L1, CLU, DCD, DSG1, DSP, FABP5, FGA, FGB, FGG, FLG2, FTL, GSN, HBB, HP, HRNR, JUP, KRT1, LTF, LYZ, MIF, PKM, PLA2G2A, QSOX1, RASGRP2, S100A1, S100A8, S100A9, SERPINA1, SERPINB1, SERPING1, TNFAIP6, TTR, VTN                                                                                     |
| 13  | Hemostasis                                      | 34                                | 1.31E-12 | A1BG, A2M, ALB, ANXA2, ANXA5, APOA1, CD109, CD47, CLEC3B, CLU, COL1A1, COL1A2, F13A1, FGA, FGB, FGG, HBB, HBD, HRG, ITH4, KIF1B, MIF, QSOX1, RASGRP2, SERPINA1, SERPINA5, SERPINC1, SERPINE2, SERPING1, TF, THBS1, TIMP1, TIMP3, TTN                                                                                                                                        |
| 14  | Neutrophil degranulation                        | 29                                | 1.53E-11 | A1BG, ANXA2, ARG1, C3, CALML5, CD47, CHI3L1, DSG1, DSP, FABP5, FLG2, FTL, GSN, HBB, HP, HRNR, JUP, KRT1, LTF, LYZ, MIF, PKM, QSOX1, S100A8, S100A9, SERPINA1, SERPINB1, TNFAIP6, TTR                                                                                                                                                                                        |
| 15  | Degradation of the extracellular matrix         | 17                                | 7.17E-11 | A2M, ACAN, COL10A1, COL11A2, COL14A1, COL15A1, COL1A1, COL1A2, COL2A1, COL6A1, COL6A2, COL6A3, DCN, HSPG2, HTRA1, MMP10, TIMP1                                                                                                                                                                                                                                              |
| 16  | Post-translational protein phosphorylation      | 15                                | 1.94E-10 | ALB, APOA1, C3, CP, FGA, FGG, MFG8, MF12, QSOX1, SERPINA1, SERPINC1, TF, TIMP1, TNC, VCAN                                                                                                                                                                                                                                                                                   |
| 17  | Immune system                                   | 57                                | 3.58E-10 | A1BG, ACTG1, ANXA1, ANXA2, ARG1, BLMH, C1S, C3, C9, CA1, CALML5, CASP8, CD47, CFB, CFI, CHI3L1, CLU, COL1A1, COL1A2, COL2A1, CSF3R, DCD, DSG1, DSP, F13A1, FABP5, FGA, FGB, FGG, FLG2, FTL, GSN, HBB, HP, HRNR, JUP, KRT1, LTF, LYZ, MIF, MSN, PKM, PLA2G2A, QSOX1, RASGRP2, S100A1, S100A8, S100A9, SERPINA1, SERPINB1, SERPING1, TIMP1, TNFAIP6, TNFRSF11B, TTR, VIM, VTN |

(Continued to the next page)

Supplementary Table 2. Continued

| No. | Enriched pathways                                                                                            | Total number of proteins involved | p-value  | Gene symbols                                                                                                                                                                                                                                           |
|-----|--------------------------------------------------------------------------------------------------------------|-----------------------------------|----------|--------------------------------------------------------------------------------------------------------------------------------------------------------------------------------------------------------------------------------------------------------|
| 18  | Assembly of collagen fibrils and other multimeric structures                                                 | 12                                | 6.15E-10 | COL10A1, COL11A2, COL14A1, COL15A1, COL1A1, COL1A2, COL2A1, COL6A1, COL6A2, COL6A3, LOX, PCOLCE                                                                                                                                                        |
| 19  | regulation of insulin-like growth factor transport and uptake by insulin-like growth factor binding proteins | 15                                | 1.03E-09 | ALB, APOA1, C3, CP, FGA, FGG, MFGE8, MF12, QSOX1, SERPINA1, SERPINC1, TF, TIMP1, TNC, VCAN                                                                                                                                                             |
| 20  | Diseases associated with glycosaminoglycan metabolism                                                        | 10                                | 3.96E-09 | ACAN, BGN, DCN, FMOD, HSPG2, LUM, OGN, OMD, PRELP, VCAN                                                                                                                                                                                                |
| 21  | Collagen chain trimerization                                                                                 | 10                                | 8.43E-09 | COL10A1, COL11A2, COL14A1, COL15A1, COL1A1, COL1A2, COL2A1, COL6A1, COL6A2, COL6A3                                                                                                                                                                     |
| 22  | Developmental biology                                                                                        | 37                                | 1.28E-08 | ACTG1, ANK2, CDSN, COL2A1, COL6A1, COL6A2, COL6A3, DSG1, DSP, H2AFV, JUP, KRT1, KRT10, KRT14, KRT15, KRT16, KRT17, KRT19, KRT2, KRT33A, KRT4, KRT5, KRT6A, KRT6B, KRT6C, KRT72, KRT73, KRT76, KRT77, KRT78, KRT79, KRT8, KRT80, KRT84, KRT9, MSN, TGM5 |
| 23  | Collagen degradation                                                                                         | 11                                | 1.37E-08 | COL10A1, COL11A2, COL14A1, COL15A1, COL1A1, COL1A2, COL2A1, COL6A1, COL6A2, COL6A3, MMP10                                                                                                                                                              |
| 24  | Formation of fibrin clot (clotting cascade)                                                                  | 9                                 | 5.04E-08 | A2M, F13A1, FGA, FGB, FGG, SERPINA5, SERPINC1, SERPINE2, SERPING1                                                                                                                                                                                      |
| 25  | Defective ST3GAL3 causes MCT12 and EIEE15                                                                    | 6                                 | 5.33E-08 | ACAN, FMOD, LUM, OGN, OMD, PRELP                                                                                                                                                                                                                       |
| 26  | Binding and uptake of ligands by scavenger receptors                                                         | 9                                 | 5.63E-08 | ALB, APOA1, COL1A1, COL1A2, FTL, HBA1, HBB, HP, HPX                                                                                                                                                                                                    |
| 27  | Nonintegrin membrane-ECM interactions                                                                        | 10                                | 6.87E-08 | COL10A1, COL11A2, COL1A1, COL1A2, COL2A1, HSPG2, THBS1, TNC, TTR, VTN                                                                                                                                                                                  |
| 28  | Amyloid fiber formation                                                                                      | 11                                | 7.28E-08 | APCS, APOA1, APOA4, FGA, GSN, HSPG2, LTF, LYZ, MFGE8, TGFBI, TTR                                                                                                                                                                                       |
| 29  | Defective CHST6 causes MCDC1                                                                                 | 6                                 | 7.93E-08 | ACAN, FMOD, LUM, OGN, OMD, PRELP                                                                                                                                                                                                                       |
| 30  | Defective B4GALT1 causes B4GALTI-CDG (CDG-2d)                                                                | 6                                 | 7.93E-08 | ACAN, FMOD, LUM, OGN, OMD, PRELP                                                                                                                                                                                                                       |
| 31  | Metabolism of carbohydrates                                                                                  | 17                                | 3.11E-07 | ACAN, B3GNT7, BGN, DCN, ENO1, FMOD, GAPDH, HSPG2, LUM, OGN, OMD, PGAM2, PGK1, PRELP, TP11, VCAN, XYLT1                                                                                                                                                 |
| 32  | Common pathway of fibrin clot formation                                                                      | 7                                 | 3.54E-07 | F13A1, FGA, FGB, FGG, SERPINA5, SERPINC1, SERPINE2                                                                                                                                                                                                     |
| 33  | Scavenging of heme from plasma                                                                               | 6                                 | 5.80E-07 | ALB, APOA1, HBA1, HBB, HP, HPX                                                                                                                                                                                                                         |
| 34  | Keratan sulfate biosynthesis                                                                                 | 7                                 | 1.03E-06 | ACAN, B3GNT7, FMOD, LUM, OGN, OMD, PRELP                                                                                                                                                                                                               |
| 35  | Regulation of complement cascade                                                                             | 8                                 | 2.02E-06 | C1S, C3, C9, CFB, CFI, CLU, SERPING1, VTN                                                                                                                                                                                                              |
| 36  | Regulation of TLR by endogenous ligand                                                                       | 6                                 | 3.19E-06 | FGA, FGB, FGG, S100A1, S100A8, S100A9                                                                                                                                                                                                                  |
| 37  | Diseases of glycosylation                                                                                    | 11                                | 9.04E-06 | ACAN, BGN, DCN, FMOD, HSPG2, LUM, OGN, OMD, PRELP, THBS1, VCAN                                                                                                                                                                                         |

(Continued to the next page)

Supplementary Table 2. Continued

| No. | Enriched pathways                                               | Total number of proteins involved | p-value  | Gene symbols                                                                                                 |
|-----|-----------------------------------------------------------------|-----------------------------------|----------|--------------------------------------------------------------------------------------------------------------|
| 38  | Erythrocytes take up oxygen and release carbon dioxide          | 4                                 | 7.48E-05 | CA1, CA2, HBA1, HBB                                                                                          |
| 39  | Platelet aggregation (plug formation)                           | 6                                 | 8.18E-05 | COL1A1, COL1A2, FGA, FGB, FGG, RASGRP2                                                                       |
| 40  | Intrinsic pathway of fibrin clot formation                      | 5                                 | 0.00011  | A2M, SERPINA5, SERPINC1, SERPINE2, SERPING1                                                                  |
| 41  | A tetrasaccharide linker sequence is required for GAG synthesis | 5                                 | 0.00022  | BGN, DCN, HSPG2, VCAN, XYLT1                                                                                 |
| 42  | Syndecan interactions                                           | 5                                 | 0.00022  | COL1A1, COL1A2, THBS1, TNC, VTN                                                                              |
| 43  | Erythrocytes take up carbon dioxide and release oxygen          | 4                                 | 0.00024  | CA1, CA2, HBA1, HBB                                                                                          |
| 44  | Apoptotic execution phase                                       | 6                                 | 0.00037  | CASP8, DSG1, DSP, GSN, HIST1H1C, VIM                                                                         |
| 45  | Signaling by PDGF                                               | 6                                 | 0.00054  | COL2A1, COL6A1, COL6A2, COL6A3, THBS1, THBS3                                                                 |
| 46  | Antimicrobial peptides                                          | 7                                 | 0.00076  | CLU, DCD, LTF, LYZ, PLA2G2A, S100A8, S100A9                                                                  |
| 47  | Crosslinking of collagen fibrils                                | 4                                 | 0.0008   | COL1A1, COL1A2, LOX, PCOLCE                                                                                  |
| 48  | Scavenging by class A receptors                                 | 4                                 | 0.0008   | APOA1, COL1A1, COL1A2, FTL                                                                                   |
| 49  | Apoptotic cleavage of cellular proteins                         | 5                                 | 0.00082  | CASP8, DSG1, DSP, GSN, VIM                                                                                   |
| 50  | Metal sequestration by antimicrobial proteins                   | 3                                 | 0.00088  | LTF, S100A8, S100A9                                                                                          |
| 51  | Defective B4GALT7 causes EDS, progeroid type                    | 4                                 | 0.0011   | BGN, DCN, HSPG2, VCAN                                                                                        |
| 52  | Defective B3GAT3 causes JDSSD-HD                                | 4                                 | 0.0011   | BGN, DCN, HSPG2, VCAN                                                                                        |
| 53  | Defective B3GALT6 causes EDSP2 and SEMDJL1                      | 4                                 | 0.0011   | BGN, DCN, HSPG2, VCAN                                                                                        |
| 54  | Signaling by receptor tyrosine kinases                          | 15                                | 0.0013   | ACTG1, CILP, COL11A2, COL1A1, COL1A2, COL2A1, COL6A1, COL6A2, COL6A3, FGFBP2, HSPB1, JUP, MST1, THBS1, THBS3 |
| 55  | Defective CHST3 causes SEDCJD                                   | 3                                 | 0.0016   | BGN, DCN, VCAN                                                                                               |
| 56  | Defective CHST14 causes EDS, musculocontractural type           | 3                                 | 0.0016   | BGN, DCN, VCAN                                                                                               |
| 57  | Defective CHSY1 causes TPBS                                     | 3                                 | 0.0016   | BGN, DCN, VCAN                                                                                               |
| 58  | Retinoid metabolism and transport                               | 5                                 | 0.0016   | APOA1, APOA4, HSPG2, RBP4, TTR                                                                               |
| 59  | Integrin alphaIIb beta3 signaling                               | 4                                 | 0.002    | FGA, FGB, FGG, RASGRP2                                                                                       |

(Continued to the next page)

Supplementary Table 2. Continued

| No. | Enriched pathways                                                                  | Total number of proteins involved | p-value | Gene symbols                                                                                                                             |
|-----|------------------------------------------------------------------------------------|-----------------------------------|---------|------------------------------------------------------------------------------------------------------------------------------------------|
| 60  | Dermatan sulfate biosynthesis                                                      | 3                                 | 0.0029  | BGN, DCN, VCAN                                                                                                                           |
| 61  | MET activates PTK2 signaling                                                       | 4                                 | 0.0031  | COL11A2, COL1A1, COL1A2, COL2A1                                                                                                          |
| 62  | Caspase-mediated cleavage of cytoskeletal proteins                                 | 3                                 | 0.0035  | CASP8, GSN, VIM                                                                                                                          |
| 63  | Disease                                                                            | 24                                | 0.0039  | ACAN, ACTG1, ALB, BGN, CP, DCN, FGA, FGB, FGG, FMOD, HSPG2, IPO5, LTF, LUM, OGN, OMD, PRDX1, PRDX2, PRELP, RBP4, THBS1, TTR, VCAN, YWHAE |
| 64  | GRB2:SOS provides linkage to MAPK signaling for Integrins                          | 3                                 | 0.0042  | FGA, FGB, FGG                                                                                                                            |
| 65  | Dissolution of fibrin clot                                                         | 3                                 | 0.0042  | ANXA2, HRG, SERPINE2                                                                                                                     |
| 66  | Cell-Cell communication                                                            | 7                                 | 0.0045  | ACTG1, ANG, CD47, FLNC, JUP, KRT14, KRT5                                                                                                 |
| 67  | Cell junction organization                                                         | 6                                 | 0.0045  | ACTG1, ANG, FLNC, JUP, KRT14, KRT5                                                                                                       |
| 68  | CS/DS degradation                                                                  | 3                                 | 0.0047  | BGN, DCN, VCAN                                                                                                                           |
| 69  | p130Cas linkage to MAPK signaling for integrins                                    | 3                                 | 0.0047  | FGA, FGB, FGG                                                                                                                            |
| 70  | Signaling by high-kinase activity BRAF mutants                                     | 4                                 | 0.0051  | ACTG1, FGA, FGB, FGG                                                                                                                     |
| 71  | Visual phototransduction                                                           | 6                                 | 0.0055  | APOA1, APOA4, HSPG2, RBP4, RDH8, TTR                                                                                                     |
| 72  | Glycolysis                                                                         | 5                                 | 0.0064  | ENO1, GAPDH, PGAM2, PGK1, TPI1                                                                                                           |
| 73  | Gene and protein expression by JAK-STAT signaling after Interleukin-12 stimulation | 4                                 | 0.0065  | ANXA2, CAL, MIF, MSN                                                                                                                     |
| 74  | MAP2K and MAPK activation                                                          | 4                                 | 0.007   | ACTG1, FGA, FGB, FGG                                                                                                                     |
| 75  | Signaling by moderate kinase activity BRAF mutants                                 | 4                                 | 0.007   | ACTG1, FGA, FGB, FGG                                                                                                                     |
| 76  | Paradoxical activation of RAF signaling by kinase inactive BRAF                    | 4                                 | 0.007   | ACTG1, FGA, FGB, FGG                                                                                                                     |
| 77  | Plasma lipoprotein assembly                                                        | 3                                 | 0.008   | A2M, APOA1, APOA4                                                                                                                        |
| 78  | NCAM1 interactions                                                                 | 4                                 | 0.0085  | COL2A1, COL6A1, COL6A2, COL6A3                                                                                                           |
| 79  | Chondroitin sulfate biosynthesis                                                   | 3                                 | 0.0089  | BGN, DCN, VCAN                                                                                                                           |
| 80  | TLR cascades                                                                       | 7                                 | 0.0099  | CASP8, FGA, FGB, FGG, S100A1, S100A8, S100A9                                                                                             |
| 81  | Initial triggering of complement                                                   | 3                                 | 0.0113  | C1S, C3, CFB                                                                                                                             |
| 82  | Alternative complement activation                                                  | 2                                 | 0.012   | C3, CFB                                                                                                                                  |

(Continued to the next page)

Supplementary Table 2. Continued

| No. | Enriched pathways                                                                         | Total number of proteins involved | p-value | Gene symbols                                                                                         |
|-----|-------------------------------------------------------------------------------------------|-----------------------------------|---------|------------------------------------------------------------------------------------------------------|
| 83  | Deregulated CDK5 triggers multiple neurodegenerative pathways in Alzheimer disease models | 3                                 | 0.0123  | <i>PRDX1, PRDX2, YWHAE</i>                                                                           |
| 84  | Apoptosis                                                                                 | 7                                 | 0.0135  | <i>CASP8, DSP, GSN, HIST1H1C, VIM, YWHAE</i>                                                         |
| 85  | The canonical retinoid cycle in rods (twilight vision)                                    | 3                                 | 0.0135  | <i>RBP4, RDH8, TTR</i>                                                                               |
| 86  | Signaling by RAS mutants                                                                  | 4                                 | 0.0155  | <i>ACTG1, FGA, FGB, FGG</i>                                                                          |
| 87  | Activation of C3 and C5                                                                   | 2                                 | 0.0185  | <i>C3, CFB</i>                                                                                       |
| 88  | HDL assembly                                                                              | 2                                 | 0.0185  | <i>A2M, APOA1</i>                                                                                    |
| 89  | Terminal pathway of complement                                                            | 2                                 | 0.0222  | <i>C9, CLU</i>                                                                                       |
| 90  | Signaling by BRAF and RAF fusions                                                         | 4                                 | 0.0225  | <i>ACTG1, FGA, FGB, FGG</i>                                                                          |
| 91  | Plasma lipoprotein remodeling                                                             | 3                                 | 0.024   | <i>ALB, APOA1, APOA4</i>                                                                             |
| 92  | HDL remodeling                                                                            | 2                                 | 0.026   | <i>ALB, APOA1</i>                                                                                    |
| 93  | Adherens junctions interactions                                                           | 3                                 | 0.0278  | <i>ACTG1, ANG, JUP</i>                                                                               |
| 94  | Chylomicron assembly                                                                      | 2                                 | 0.0304  | <i>APOA1, APOA4</i>                                                                                  |
| 95  | Chylomicron remodeling                                                                    | 2                                 | 0.0304  | <i>APOA1, APOA4</i>                                                                                  |
| 96  | Vesicle-mediated transport                                                                | 15                                | 0.0308  | <i>ACTG1, ALB, ANK2, APOA1, COL1A1, COL1A2, FTL, HBA1, HBB, HP, HPX, KIF1B, SERPINAL1, TF, YWHAE</i> |
| 97  | Plasma lipoprotein assembly, remodeling, and clearance                                    | 4                                 | 0.0318  | <i>A2M, ALB, APOA1, APOA4</i>                                                                        |
| 98  | Interleukin-4 and Interleukin-13 signaling                                                | 5                                 | 0.0318  | <i>ANXA1, COL1A2, FI3A1, TIMP1, VIM</i>                                                              |
| 99  | Detoxification of reactive oxygen species                                                 | 3                                 | 0.0332  | <i>PRDX1, PRDX2, SOD3</i>                                                                            |
| 100 | Apoptotic cleavage of cell adhesion proteins                                              | 2                                 | 0.0338  | <i>DSG1, DSP</i>                                                                                     |
| 101 | GP1b-IX-V activation signalling                                                           | 2                                 | 0.0338  | <i>COL1A1, COL1A2</i>                                                                                |
| 102 | Type I hemidesmosome assembly                                                             | 2                                 | 0.0338  | <i>KRT14, KRT5</i>                                                                                   |
| 103 | Reversible hydration of carbon dioxide                                                    | 2                                 | 0.0382  | <i>CA1, CA2</i>                                                                                      |
| 104 | Retinoid cycle disease events                                                             | 2                                 | 0.0382  | <i>RBP4, TTR</i>                                                                                     |
| 105 | G alpha (i) signalling events                                                             | 10                                | 0.0499  | <i>AGT, ANXA1, APOA1, APOA4, C3, HSPG2, INSL5, RBP4, RDH8, TTR</i>                                   |

ECM, extracellular matrix; TLR, Toll-like receptor; GAG, glycosaminoglycans; PDGF, platelet-derived growth factor; EDS, Ehlers-Danlos syndrome; TPBS, temtamy preaxial brachydactyly syndrome; PTK2, protein tyrosine kinase 2; MAPK, mitogen-activated protein kinase; HDL, high-density lipoprotein.
