# Supplementary material for: Proteomic Signatures of Healthy Intervertebral Discs From Organ Donors: A Comparison With Previous Studies on Discs From Scoliosis, Animals, and Trauma
Source: PubMed Central journal article supplement — Neurospine. 2020 Jun 30;17(2):426–42. doi: 10.14245/ns.2040056.028 (PMC7338947; doi:10.14245/ns.2040056.028), 2020-06-30
Supplement: ns-2040056-028-suppl3.pdf [file ns-2040056-028-suppl3.pdf]

**Supplementary Table 3.** Catalog of proteins that were found in our study and other literatures

| Study population of MRI normal discs                                                  | Collagens | Keratins | SERPIN super family of proteins |
|---------------------------------------------------------------------------------------|-----------|----------|---------------------------------|
| Discs harvested from brain dead organ donors in living conditions-Our study           | COL1A2    | KRT1     | SERPINA1                        |
|                                                                                       | COL1A1    | KRT2     | SERPINA3                        |
|                                                                                       | COL2A1    | KRT4     | SERPINA4                        |
|                                                                                       | COL5A3    | KRT5     | SERPINA5                        |
|                                                                                       | COL6A1    | KRT6A    | SERPINB1                        |
|                                                                                       | COL6A2    | KRT6C    | SERPINC1                        |
|                                                                                       | COL6A6    | KRT15    | SERPINE1                        |
|                                                                                       | COL7A1    | KRT16    | SERPINE2                        |
|                                                                                       | COL8A1    | KRT17    | SERPINF1                        |
|                                                                                       | COL9A2    | KRT19    | SERPINF2                        |
|                                                                                       | COL10A1   | KRT33A   | SERPING1                        |
|                                                                                       | COL11A2   | KRT72    | SERPINI1                        |
|                                                                                       | COL14A1   | KRT73    |                                 |
|                                                                                       | COL15A1   | KRT76    |                                 |
|                                                                                       | COL18A1   | KRT79    |                                 |
|                                                                                       | COL20A1   | KRT80    |                                 |
|                                                                                       | COL24A1   | KRT84    |                                 |
|                                                                                       |           | KRT85    |                                 |
| Samples harvested from discs during scoliosis surgery- Yee et al., 2016 <sup>19</sup> | COL1A2    | Nil      | Nil                             |
|                                                                                       | COL14A1   |          |                                 |
|                                                                                       | COL16A1   |          |                                 |
|                                                                                       | COL20A1   |          |                                 |
| Samples harvested from discs during scoliosis surgery- Yee et al., 2016 <sup>19</sup> | COL1A1    | KRT1     | SERPINA1                        |
|                                                                                       | COL1A2    | KRT2     | SERPINC1                        |
|                                                                                       | COL2A1    |          | SERPINE2                        |
|                                                                                       | COL3A1    |          |                                 |
|                                                                                       | COL6A3    |          |                                 |

MRI, magnetic resonance imaging; SERPIN, serine protease inhibitors.
